# Supplementary material for: In situ controlled rapid growth of novel high activity TiB2/(TiB2–TiN) hierarchical/heterostructured nanocomposites
Source: publisher site journal article supplement (doi:10.3762/bjnano.8.211), 2017-10-10
Supplement: Additional file 1 [file 2190-4286-8-211-S1.pdf]

# Supporting Information

for

## **In situ controlled rapid growth of novel high activity TiB<sub>2</sub>/(TiB<sub>2</sub>-TiN) hierarchical/heterostructured nanocomposites**

Jilin Wang<sup>1</sup>, Hejie Liao<sup>1</sup>, Yuchun Ji<sup>1</sup>, Fei Long<sup>1,\*</sup>, Yunle Gu<sup>2</sup>, Zhengguang Zou<sup>1</sup>,  
Weimin Wang<sup>\*3</sup>, and Zhengyi Fu<sup>3</sup>

Address: <sup>1</sup>School of Materials Science and Engineering, Key Laboratory of Nonferrous Materials and New Processing Technology of Ministry of Education, Guilin University of Technology, Guilin 541004, China, <sup>2</sup>Nano and Ceramic Materials Research Center, Wuhan Institute of Technology, Wuhan 430073, China, and <sup>3</sup>The State Key Laboratory of Advanced Technology for Materials Synthesis and Processing, Wuhan University of Technology, Wuhan 430070, China

\* Corresponding author

Email: Fei Long\* - [longf@glut.edu.cn](mailto:longf@glut.edu.cn); Weimin Wang\* - [shswmwang@whut.edu.cn](mailto:shswmwang@whut.edu.cn)

## **Additional TG-DSC results**

**Table 1:** The major related TG-DSC results and the average particle sizes of the samples.

| Sample                                                | Particle size | TG Temperature range | DSC exothermic peak temperature | DSC exothermic peak area | TG weight change |
|-------------------------------------------------------|---------------|----------------------|---------------------------------|--------------------------|------------------|
| #1-Commercial pure TiB <sub>2</sub> (contrast sample) | 5um           | 1-463°C~550°C        | Peak 1-518°C                    | Peak 1< Peak 2           | ↑9%              |
|                                                       |               | 2-550°C~839°C        | Peak 2-710°C                    |                          | ↑82%             |
| #2-0% endothermic rate                                | 0.9um         | 1-446°C~577°C        | Peak 1-490°C                    | Peak 1≈ Peak 2           | ↑28%             |
|                                                       |               | 2-577°C~707°C        | Peak 2-644°C                    |                          | ↑45%             |
| #3-40% endothermic rate                               | 0.15um        | 1-422°C~517°C        | Peak 1-480°C                    | Peak 1> Peak 2           | ↑35%             |
|                                                       |               | 2-517°C~695°C        | Peak 2-630°C                    |                          | ↑27%             |
